1 **Environmental RNAi-based reverse genetics in the predatory mite *Neoseiulus californicus*:**  
2 **towards improved methods of biological control**

3

4 **Noureldin Abuelfadl Ghazy<sup>1,2,3\*</sup>, Takeshi Suzuki<sup>1,4,\*</sup>**

5

6 <sup>1</sup>Graduate School of Bio-Applications and Systems Engineering, Tokyo University of  
7 Agriculture and Technology, Koganei, Tokyo 184-8588, Japan

8 <sup>2</sup>Agriculture Zoology Department, Faculty of Agriculture, Mansoura University, 35516 El-  
9 Mansoura, Egypt

10 <sup>3</sup>Japan Society for the Promotion of Science, Chiyoda, Tokyo 102-0083, Japan

11 <sup>4</sup>Institute of Global Innovation Research, Tokyo University of Agriculture and Technology,  
12 Fuchu, Tokyo 183-8538, Japan

13

14 \*Corresponding Author

15 Noureldin Abuelfadl Ghazy

16 [noureldinghazy@mans.edu.eg](mailto:noureldinghazy@mans.edu.eg)

17 ORCID: 0000-0001-5911-086X

18 Takeshi Suzuki

19 [tszk@cc.tuat.ac.jp](mailto:tszk@cc.tuat.ac.jp)

20 ORCID: 0000-0002-7930-1425

21 **ABSTRACT**

22 The predatory mite *Neoseiulus californicus* (McGregor) (Mesostigmata: Phytoseiidae) has  
23 been commercialized by manufacturers in the pest control industry and is used worldwide as  
24 a natural enemy of spider mites. However, because its genome has not been sequenced,  
25 reverse genetics techniques that could be used to analyze gene function have not been  
26 established. Here we partially sequenced the gene that encodes the vacuolar-type H<sup>+</sup>-ATPase  
27 (V-ATPase), an ATP-dependent proton pump, in *N. californicus* (*NcVATPase*) and then  
28 conducted a functional analysis using environmental RNA interference (eRNAi) by orally  
29 administering sequence-specific exogenous dsRNA (*dsRNA-NcVATPase*) to larvae and adult  
30 females. The larvae treated with *dsRNA-NcVATPase* took longer to develop and had lower  
31 survivorship, fecundity, and offspring viability at the adult stage than those treated with a  
32 control dsRNA. Adult females treated with *dsRNA-NcVATPase* showed significant reductions  
33 in survival, fecundity, and prey consumption, and their endogenous gene expression level of  
34 *NcVATPase* was reduced by approximately 65% compared with the control. Our findings  
35 suggest that the *NcVATPase* gene, silencing of which inhibits feeding and reproduction, is an  
36 excellent biomarker for investigating the eRNAi mechanism in *N. californicus*. The highly  
37 efficient experimental system of eRNAi established in this study paves the way for applied  
38 research using eRNAi to enhance the predatory ability of *N. californicus*.

39

40 **Keywords:** Fecundity, Phenotype, Phytoseiid mite, RNAi, Survival, *V-ATPase*

41

42 **Key message:**

- 43
- 44 • Environmental RNAi-inducing double-stranded RNAs have the potential to improve  
biological control as well as biopesticide applications.
  - 45 • We investigated the efficacy of eRNAi against the predatory mite *Neoseiulus*  
46 *californicus*, a major natural enemy of spider mites.
  - 47 • Oral administration of dsRNA targeting *NcVATPase* decreased the gene expression  
48 level, developmental time, survival, fecundity, and prey consumption.

- 49       • *Neoseiulus californicus*, which was found to have the high eRNAi effects, can be used  
50       as a model for the study on eRNAi-mediated improvement of biological control.

## 51 INTRODUCTION

52 The vacuolar-type H<sup>+</sup>-ATPases (V-ATPases) are a family of ATP-dependent proton pumps that  
53 play a role in luminal acidification of the intracellular compartments in eukaryotic cells (Nishi  
54 and Forgac 2002). Acidic intracellular compartments are required for several cellular  
55 processes including receptor-mediated endocytosis, intracellular trafficking, protein  
56 processing and degradation, and coupled transport of substrates across membranes (Harvey  
57 1992; Forgac 2007; Wieczorek et al. 2009; Maxson and Grinstein 2014). Structurally, V-  
58 ATPases are composed of two domains: (1) the integral membrane-embedded V<sub>0</sub> domain  
59 composed of a variable number of subunits (a, c, d, and e in insects; a, d, e, c, c', and c'' in  
60 yeast; a, c, c'', d, e, and Ac45 in higher eukaryotes) that is responsible for proton translocation  
61 across the membrane via a rotary mechanism, and (2) the peripheral V<sub>1</sub> domain with eight  
62 different subunits (A–H) that is responsible for ATP hydrolysis (Merzendorfer et al. 2000; Nishi  
63 and Forgac 2002; Toei et al. 2010; Maxson and Grinstein 2014; Cotter et al. 2015). V-ATPases  
64 that are expressed at the plasma membrane acidify the extracellular microenvironment and  
65 energize transcellular and paracellular transport (Nishi and Forgac 2002; Forgac 2007; Maxson  
66 and Grinstein 2014). In insects, V-ATPases energize K<sup>+</sup> pumps to maintain a higher  
67 concentration of potassium, thus creating an electrical difference that allows nutrient uptake  
68 by midgut cells, fluid secretion by Malpighian tubules, and fluid absorption by insect ovarian  
69 follicle cells (Klein 1992; Harvey et al. 1998; Wieczorek et al. 2000). In addition, V-ATPases are  
70 reported to expel H<sup>+</sup> from cells in the insect midgut to create a membrane potential that  
71 drives Na<sup>+</sup> that is linked to an amino acid into the cell via nutrient amino acid transporters  
72 (Harvey et al. 2009; Fu et al. 2014, 2015).

73 Post-transcriptional gene silencing mediated by RNA interference (RNAi) is a  
74 conserved biological process in eukaryotes that is triggered by sequence-specific double-  
75 stranded RNA (dsRNA) (Fire et al. 1998; Hannon 2002). Accumulating experimental evidence  
76 in arthropods shows that RNAi can be initiated by introducing exogenous dsRNA against the  
77 gene of interest through direct injection or through ingestion, either of an artificial diet or  
78 drinking water containing the dsRNA itself or of bacteria or plant cells that express the dsRNA  
79 (Baum et al. 2007; Khila and Grbić 2007; Huvenne and Smagghe 2010; Yao et al. 2013; Suzuki  
80 et al. 2017a; Sijja et al. 2019; Ghazy et al. 2020; Bensoussan et al. 2020). Because the RNAi  
81 method of gene silencing is versatile, simple, and effective, it has been employed in a vast

82 array of research, from functional genomic studies to the potential application of spraying  
83 dsRNA as a bio-pesticide against pest arthropods. In the context of arthropod pests and their  
84 natural enemies, RNAi studies that investigate the “off-target” effects of dsRNA in a natural  
85 enemy of a target pest and the effect of manipulation of reproductive or behavioral gene  
86 expression in a predator or parasite can be applied to enhance their functions as a predator  
87 or parasite in biological control programs (Pomerantz and Hoy 2015).

88 The predatory mite, *Neoseiulus californicus* (McGregor) (Mesostigmata: Phytoseiidae)  
89 is widely used as a biological control against tetranychid mites (Prostigmata: Tetranychidae).  
90 As a predatory omnivore, *N. californicus* also feeds on other phytophagous mites, small  
91 insects, and pollen (Castagnoli and Simoni 2003; McMurtry et al. 2013). The ability of *N.*  
92 *californicus* to feed on alternative prey when tetranychids are scarce has advanced its role as  
93 an important biological control agent that is commercially produced by several companies  
94 worldwide. To date, only a few studies have reported the use of RNAi-based reverse genetics  
95 in phytoseiid mites. These studies have shown that, in a fashion similar to nematodes and  
96 other arthropods, the phytoseiid mites *Phytoseiulus persimilis* Athias-Henriot and  
97 *Galendromus (=Metaseiulus) occidentalis* (Nesbitt) are amenable to environmental RNAi  
98 (eRNAi) when it is induced by delivering exogenous dsRNA orally (Ozawa et al. 2012; Wu and  
99 Hoy 2014, 2016; Pomerantz and Hoy 2015; Pomerantz et al. 2015; Sijia et al. 2019).

100 The study described here is the first RNAi study in the genus *Neoseiulus*. We isolated  
101 and partially sequenced the gene encoding V-ATPase in *N. californicus* (*NcVATPase*; GenBank  
102 accession number: MK281632) and then analyzed the gene function by using an eRNAi  
103 method based on the oral delivery technique (Ghazy and Suzuki 2019). We found that the  
104 *NcVATPase* gene is involved in development during the immature stages, and in adult survival,  
105 reproduction, feeding, and appetite. This study focused on establishing an efficient method  
106 of orally feeding dsRNA to suppress the expression of a target gene linked to behavioral  
107 changes and thus paves the way for using eRNAi-based genetic screens to enhance the  
108 functions of predatory mites.

109

## 110 MATERIALS AND METHODS

## 111 **Source of *N. californicus* colony**

112 A commercial population of *N. californicus* was obtained from Sumika Technoservice  
113 (Takarazuka, Japan) in 2017 and has been routinely reared on detached kidney bean leaves  
114 (*Phaseolus vulgaris* L.) infested with the two-spotted spider mite (*Tetranychus urticae* Koch)  
115 as its prey. Mites were maintained and all experiments in this study were conducted at 25 °C,  
116 50%–65% relative humidity and a light:dark cycle of 16:8 h. An air pump–based system was  
117 used to collect mites for experiments (Suzuki et al. 2017b).

## 118 ***NcVATPase* gene sequencing**

119 Total RNA was extracted from ca. 400 adult females of *N. californicus* frozen in liquid nitrogen  
120 with NucleoSpin RNA Plus (Macherey-Nagel, Düren, Germany), following the manufacturer’s  
121 instructions. The quality and quantity of RNA were measured using a spectrophotometer  
122 (NanoPhotometer N60; Implen, Munich, Germany). cDNA was synthesized from 3 µg of total  
123 RNA using reverse transcriptase (SuperScript II Reverse Transcriptase; Thermo Fisher  
124 Scientific, Waltham, MA) and an oligo (dT)<sub>12–18</sub> primer (Thermo Fisher Scientific), according to  
125 the manufacturer’s protocol. cDNA was then stored at –30 °C until used. To amplify  
126 *NcVATPase*, degenerate primers (5′-GGCCACCATCCAGGTGtaygargarac-3′ and 3′-  
127 ccnccnctraaGAGGCTGGGGCACTG-5′) were designed based on aligned amino acid sequences  
128 of V-ATPase from the predatory phytoseiid mite *G. occidentalis* (Mesostigmata: Phytoseiidae)  
129 (GenBank accession number: XP\_003741079.1) and the parasitic mite *Varroa destructor*  
130 Anderson and Trueman (Mesostigmata: Varroidae) (GenBank accession number:  
131 XP\_022670783.1) by using the CODEHOP program (Rose et al. 1998). The resulting sequence  
132 of *NcVATPase* shares 85% similarity with that of *G. occidentalis* and 75% similarity with that  
133 of the *Varroa* species. An evolutionary analysis of *NcVATPase* was performed using MEGA  
134 10.05 software on ClustalW-aligned amino acid sequences of V-ATPases from several mite,  
135 tick, and insect species by the neighbor-joining method and with 500 bootstrap replicates.  
136 The species list and GenBank accession numbers are presented in Table S1.

## 137 **dsRNA synthesis**

138 The partial sequence of *NcVATPase* was used to design sequence-specific primers containing  
139 T7 promoter sequences (5′-TAATACGACTCACTATAGGGGGAAACCTCTCTCCGTCGAA-3′ and 5′-  
140 TAATACGACTCACTATAGGGGCCATCGAACTCTGTTTCCA-3′) to amplify a 344-bp DNA fragment

141 of *NcVATPase*. For the negative control, a 659-bp DNA fragment of *DsRed2* was amplified  
142 from 1 ng of pDsRed2-N1 plasmid (Clontech, Mountain View, CA, USA) with primers (5'-  
143 TAATACGACTCACTATAGGGCGTGCCTCGTACACTGAGG-3' and 5'-  
144 TAATACGACTCACTATAGGGTCATCACCGAGTTCATGCG-3'), according to the method used by  
145 Tokuoka et al. (2017). The PCR amplifications were carried out using a DNA polymerase  
146 (Phusion High-Fidelity DNA Polymerase; New England Biolabs, Hitchin, UK). The DNA  
147 fragments were then purified with a NucleoSpin Gel and PCR Clean-Up Kit (Macherey-Nagel).  
148 The integrity of the purified DNA fragments was confirmed by 2% (w/v) agarose gel  
149 electrophoresis, quantified with the spectrophotometer, and stored at -30 °C until used. Both  
150 types of DNA fragment (0.1 µg) were used as templates to synthesize RNA using an *in vitro*  
151 transcription kit (*in vitro* Transcription T7 Kit; Takara Bio, Shiga, Japan) in 1.5 mL centrifuge  
152 tubes. The fragments were denatured at 95 °C for 5 min then slowly cooled to room  
153 temperature to facilitate dsRNA formation (Suzuki et al. 2017a). The dsRNA was purified with  
154 a phenol:chloroform:isoamyl alcohol (25:24:1) solution and precipitated with ethanol. The  
155 dsRNA precipitate was dissolved in nuclease-free water, and then quantity and quality were  
156 checked on a spectrophotometer and by electrophoresis in 2% (w/v) agarose gel.

### 157 **RNAi bioassay**

158 The *in vitro* droplet feeding method (Ghazy and Suzuki 2019) was used to deliver dsRNA-  
159 *NcVATPase* or dsRNA-*DsRed2* (negative control) to age-synchronized protonymphs and adult  
160 females of *N. californicus*. Newly hatched larvae (~10-h old) or 2–3-day-old adult females  
161 were confined in 0.5-mL polypropylene tubes and a single 1-µL droplet of either type of dsRNA  
162 (1 µg µL<sup>-1</sup>) was placed on the inner surface of each tube lid. The test mites were allowed to  
163 feed on the droplet for 24 h at 25 °C. A Brilliant Blue FCF tracer dye was first added to the  
164 dsRNA solution so that successful delivery could be confirmed by the presence of the color  
165 blue in the alimentary canal of treated adult females and protonymphs that emerged from  
166 larvae during the 24 h after treatment (Fig. 1). As Ghazy and Suzuki (2019) note, the blue color  
167 of the tracer dye is not observable in the alimentary canal of larvae but, because at 25 °C the  
168 larval stage is usually shorter than 24 h (e.g., Gotoh et al. 2004), the color is visible in ~100%  
169 of the protonymphs that emerge. After dsRNA delivery had been confirmed, the adult females  
170 were transferred to normal rearing conditions and provided with *T. urticae* at random life  
171 stages as prey on discs of kidney bean leaves (2.5 cm diameter, 2 to 5 females/disc). The adult

172 females were observed for 10 days after treatment and their survival and fecundity were  
173 recorded every day. The feeding activity of adult females was also examined for three  
174 successive days after the dsRNA treatment. To do this, a known number of *T. urticae* eggs was  
175 provided to groups of two females of *N. californicus* every day on leaf discs (2 cm diameter)  
176 and the number of eggs consumed was recorded. As for protonymphs, after dsRNA delivery  
177 they were transferred individually onto leaf discs (1.5 cm diameter) with a surplus number of  
178 *T. urticae* at random life stages, and the developmental time to adulthood, survival at 10 days  
179 after treatment, fecundity (during the first 5 days of oviposition) of emerged adult females,  
180 and hatching success of their eggs were determined.

### 181 **Real-time quantitative reverse transcription-PCR analysis**

182 Adult females treated with dsRNA-*NcVATPase* or dsRNA-*DsRed2* were collected at 4 days  
183 after treatment (~50 females in each of three biological replicates). Total RNA was extracted  
184 using NucleoSpin RNA Plus (Macherey-Nagel), and single-stranded cDNA was synthesized by  
185 reverse transcription of total RNA using a High Capacity cDNA Reverse Transcription Kit  
186 (Applied Biosystems, Foster City, CA, USA). Real-time quantitative reverse transcription PCR  
187 (real-time RT-qPCR) reactions were performed in 3 technical replicates for each sample with  
188 Power SYBR Green Master Mix (Applied Biosystems). The real-time RT-qPCR reactions were  
189 performed on an ABI StepOnePlus Real-Time PCR System (Applied Biosystems). The  
190 *NcVATPase* primers used for real-time RT-qPCR were 5'-GGAGTTCAATCCCTCCAACA-3' and 5'-  
191 GGGCTCAAGCATGATTTTGT-3'. A fragment of *N. californicus Actin* gene was amplified using  
192 primers (5'-TGAGGCAATCGGTGTGTTTG-3' and 5'-TTTTACGATTGGCCTTGGG-3') designed  
193 from the nucleotide sequence of the *Actin 1* gene in the predatory mite *N. cucumeris*  
194 (GenBank accession number: KC335208.1). The nucleotide sequence of the fragments  
195 amplified from *N. californicus* (GenBank accession number: MK848403) has 95% similarity  
196 with that of *Actin 1* in *N. cucumeris*. The real-time RT-qPCR was performed using primers  
197 specific to *N. californicus Actin* (5'-TGGCACCACCTTCTACAA-3' and 5'-  
198 GGGTTTTACGATTGGCCTT-3'). The expression level of the *Actin* gene was used as a reference  
199 gene when normalizing the expression data of *NcVATPase*. Amplification efficiencies for the  
200 target gene ( $E_T$ ) and reference gene ( $E_R$ ) were 98.1% and 106.1%, respectively. The average  
201 threshold cycle ( $C_t$ ) value was calculated from three technical replicates of each biological  
202 replicate. The expression value of the target gene (T) was normalized to the reference gene



203 (R), and the normalized relative quantity (NRQ) was calculated as follows:  $NRQ = (1 + E_R)^{CtR} /$   
204  $(1 + E_T)^{CtT}$ .

## 205 **Data analysis**

206 The survival curves were plotted using the Kaplan–Meier method (R function: `survfit`,  
207 package: `survival`), and survival curves were compared using the log-rank test (R function:  
208 `survdiff`, package: `survival`). Differences in fecundity, prey egg consumption, and the relative  
209 quantity of *NcVATPase* gene expression between the dsRNA treatments in mites that had  
210 been treated when they were adult females, and in developmental time to adulthood and  
211 fecundity in mites that had been treated while they were protonymphs were statistically  
212 analyzed with a *t*-test (R function: `t.test`). A chi-square test was performed to analyze the  
213 survival of mites treated when they were protonymphs and the hatchability of eggs from  
214 females that emerged. Data were analyzed and visualized with R v. 3.5.1 (R Core Team, 2020).

215

## 216 **RESULTS**

### 217 **Sequence analysis of *NcVATPase***

218 The partial sequence fragment of *NcVATPase* (419 bp) encoded 123 amino acids and had a  
219 molecular weight of 13.86 kDa. The amino acid sequence has high similarity with V-ATPase A  
220 from *G. occidentalis* (93%), *V. destructor* (83%; GenBank accession numbers: XP\_022670784.1  
221 and XP\_022670783.1), the ectoparasitic mite *Tropilaelaps mercedesae* (Mesostigmata:  
222 Laelapidae) (80%; GenBank accession number: OQR76956.1), and the deer tick *Ixodes*  
223 *scapularis* (Ixodida: Ixodidae) (72%; GenBank accession number: XP\_029849202.1). The  
224 phylogenetic tree constructed by using the neighbor-joining method from V-ATPases in mites,  
225 ticks, and several species of insects (Table S1) showed that *N. californicus* V-ATPase was  
226 clustered with those of mesostigmatid mites: *G. occidentalis*, *T. mercedesae*, and *V. destructor*  
227 (Fig. 2).

### 228 **RNAi in adult females**

229 The expression level of endogenous *NcVATPase* transcripts was significantly lower in adult  
230 females of *N. californicus* treated with dsRNA-*NcVATPase* and was 35% of that in the control  
231 (Fig. 3a). Oral delivery of dsRNA-*NcVATPase* significantly reduced mite survival to 25% at 10

232 days after treatment (Fig. 3b). Mites treated with dsRNA-*NcVATPase* ceased producing eggs  
233 within 3 days after treatment and did not recover reproductive ability even at 10 days after  
234 treatment. In total, mites treated with dsRNA-*NcVATPase* produced up to 15 times fewer eggs  
235 than *DsRed2*-treated control mites (Fig. 3c). Furthermore, mites treated with dsRNA-  
236 *NcVATPase* were less voracious, with 22% food consumption (8.7 prey eggs/female/3 days)  
237 relative to the control (40.4 prey eggs/female/3 days) (Fig. 3d). In addition to reductions in  
238 level of *NcVATPase* transcript, survival, fecundity, and feeding, a small body size was observed  
239 as a typical phenotype in mites treated with dsRNA-*NcVATPase* (Fig. 3e).

#### 240 **RNAi in larvae**

241 Within 24 h of being confined, the larvae became protonymphs in which the alimentary canal  
242 was colored with the blue tracer dye, thus providing evidence that dsRNA delivery had been  
243 successful. The time needed for larvae treated with *NcVATPase* to reach the adult stage was  
244 only slightly longer than that for the control, but the difference was nevertheless significant  
245 (Fig. 4a). The survival rate of mites that emerged from larvae treated with dsRNA-*NcVATPase*  
246 was 78% ( $n = 54$ ), which was significantly lower than in control mites (92%,  $n = 56$ , Fig. 4b).  
247 The fecundity of adult females that emerged from larvae exposed to dsRNA-*NcVATPase* was  
248 significantly lower than in the control (Fig. 4c), and the hatchability of their eggs was also  
249 significantly lower, with many of the eggs deformed (Figs. 4d, e).

250

#### 251 **DISCUSSION**

252 In this study, we partially sequenced the gene that encodes V-ATPase subunit A in the  
253 predatory mite *N. californicus*. The amino acid sequence from a retrieved DNA fragment of  
254 *NcVATPase* showed 72% to 83% similarity with V-ATPase genes from *G. occidentalis*, *V.*  
255 *destructor*, the ectoparasitic mite *T. mercedesae*, and the deer tick *I. scapularis*. A  
256 phylogenetic analysis of the V-ATPase amino acid sequences in known mites, ticks, and  
257 several insect species revealed that the V-ATPase of *N. californicus* belongs to a cluster found  
258 in Mesostigmata mites (Fig. 2). A functional analysis of *NcVATPase* was performed by using  
259 an eRNAi technique in which dsRNA was orally delivered (Ghazy and Suzuki 2019). We found  
260 that the *NcVATPase* gene is involved in multiple functions, and its silencing affected  
261 development, survival, fecundity, and egg maturation in *N. californicus*. The results are

262 generally consistent with previous reports on insects, ticks, mites, and nematodes and  
263 indicate that the functions of *V-ATPase* in invertebrates are conserved (Huvenne and  
264 Smagghe 2010; Knight and Behm 2012; Petchampai et al. 2014; Suzuki et al. 2017a;  
265 Bensoussan et al. 2020; Ghazy et al. 2020).

266 Oral delivery of dsRNA-*NcVATPase* to adult *N. californicus* females resulted in  
267 significant reductions in mRNA transcript level, mite survival, fecundity, and feeding appetite  
268 (Fig. 3). These results are compatible with those of a previous study on *T. urticae*, which  
269 reported that targeting the *TuVATPase* gene with dsRNA significantly reduces adult survival  
270 and fecundity (Suzuki et al. 2017a). The reduction in mite survival and fecundity when the *V-*  
271 *ATPase* gene was silenced (Figs. 3b, c) may be correlated with the lower predation activity of  
272 *N. californicus*, measured as the number of prey eggs consumed (Fig. 3d). Although the  
273 mechanism involved is still unknown, it has been reported that gene silencing of *V-ATPase*  
274 decreases insects' appetite. For instance, co-silencing the *coatomer β* and *V-ATPase A* genes  
275 reduces the feeding activity of the cotton bollworm *Helicoverpa armigera* (Hübner)  
276 (Lepidoptera: Noctuidae) (Mao et al. 2015). After dsRNA-mediated silencing of *V-ATPase*  
277 genes, feeding is also inhibited in the tomato leafminer *Tuta absoluta* (Meyrick) (Lepidoptera:  
278 Gelechiidae) and the western corn rootworm *Diabrotica virgifera virgifera* LeConte  
279 (Coleoptera: Chrysomelidae) (Baum et al. 2007; Camargo et al. 2016.). In our study, the  
280 inhibited feeding may have caused nutritional deficiency in adults, which in turn hindered egg  
281 production and/or embryonic development and resulted in lower fecundity being observed  
282 after the treatment with dsRNA-*NcVATPase* (Fig. 3b).

283 When mites were treated from the larval stage, they took significantly longer to  
284 develop (Fig. 4a) and survived for a shorter time (Fig. 4b). In addition, even after they emerged  
285 as adults, the treated mites still had phenotypes related to *V-ATPase* gene silencing, such as  
286 reduced fecundity and production of deformed immature eggs with low hatchability (Figs. 4c–  
287 e). Transgenerational RNAi is often called “parental RNAi” and has been reported in  
288 nematodes, insects, and mites (e.g., Fire et al. 1998; Bucher et al. 2002; Khila and Grbic 2007;  
289 Wu and Hoy 2014); however, in most of these studies the dsRNA was injected into or ingested  
290 by adults or pupae. In our study, we showed that the effects of orally administering dsRNA in  
291 the early immature stages of *N. californicus* persisted into the adult stage and even into the  
292 next generation, which indicates the robust and persistent effect of parental RNAi in this

293 species. Hoy et al. (2016) have suggested that systemic and parental RNAi by oral  
294 administration of dsRNA in *G. occidentalis* is mediated by the *clathrin heavy chain* gene, which  
295 is responsible for endocytosis of dsRNA uptake, and by the *RNA-dependent RNA polymerase*  
296 gene (of which at least three copies are present in this species), which is responsible for dsRNA  
297 amplification. The robust and long-term parental RNAi effects in *N. californicus*, a member of  
298 the same Mesostigmata suborder, also suggest the existence of a similar RNAi machinery and  
299 pathway to that seen in *G. occidentalis*.

300         The downregulation of the *V-ATPase* genes in insects and mites has been frequently  
301 reported to cause growth inhibition, molting defects, and reproductive disorders. For instance,  
302 nymphal molting defects and growth inhibition result from RNAi-mediated gene silencing of  
303 *V-ATPase subunit B* in the smokybrown cockroach *Periplaneta fuliginosa* (Serville) (Blattodea:  
304 Blattidae) or of *V-ATPase subunit H* in the migratory locust *Locusta migratoria* L. (Orthoptera:  
305 Acrididae) (Li and Xia 2012; Sato et al. 2019). Similar phenotypes have also been observed in  
306 the small hive beetle *Aethina tumida* Murray (Coleoptera: Nitidulidae) when the *V-ATPase*  
307 *subunit A* gene was silenced (Powell et al. 2017). Decreased fecundity is the most prominent  
308 phenotype induced by RNAi-mediated silencing of the *V-ATPase* gene in *T. urticae* (Suzuki et  
309 al. 2017a; Bensoussan et al. 2020; Ghazy et al. 2020). In our study, the adults that emerged  
310 from treated larvae produced deformed and immature eggs, which may indicate that nutrient  
311 uptake or nutrition utilization was interrupted in the treated mites. Yao et al. (2013) reported  
312 that gene silencing of *V-ATPase subunit B* or *subunit D* in the corn planthopper *Peregrinus*  
313 *maidis* (Ashmead) (Hemiptera: Delphacidae) has a negative impact on nymphal development,  
314 survival, and fecundity and inhibits the development of the reproductive organs in treated  
315 females. They further reported that nymphs injected with dsRNA of *V-ATPase subunit B* or  
316 *subunit D* lose their ability to produce eggs as adult females. This may indicate that V-ATPases  
317 play a role in yolk processing during embryogenesis, as observed in the fruit fly *Drosophila*  
318 *melanogaster* Meigen (Bohrmann and Braun 1999). Against the background of this previous  
319 evidence, the results of our study further highlight that the *V-ATPase* genes have diverse and  
320 conserved functions in eukaryotes.

321         To the best of our knowledge, this is the first report on the response to RNAi in *N.*  
322 *californicus*. Because the oral method used to deliver dsRNA is simple and effective, it can be  
323 used for a vast array of RNAi-based gene function studies. The amenability to RNAi displayed

324 by *N. californicus* in this study and by other phytoseiid mites, such as *P. persimilis* (Ozawa et  
325 al. 2012; Sijia et al. 2019) and *G. occidentalis* (Wu and Hoy 2014, 2016; Pomerantz and Hoy  
326 2015; Pomerantz et al. 2015), will pave the way for more in-depth investigations into  
327 phytoseiid genetics and will facilitate the study of RNAi off-target effects, if any, in this highly  
328 important group of natural enemies. In addition, the robust and long-term RNAi effects  
329 observed in *N. californicus* indicate that dsRNA shows potential for use as an oral supplement  
330 to enhance predation performance. Based on the reverse genetic methodology developed in  
331 this study, we will conduct a highly efficient eRNAi screen to identify target genes that  
332 regulate feeding behavior in *N. californicus*.

333

### 334 **ACKNOWLEDGEMENTS**

335 This study was supported by the following grants to TS: JSPS KAKENHI (18H02203 and  
336 21H02193), JST OPERA (JPMJOP1833), and from the Bio-oriented Technology Research  
337 Advancement Institution (JPJ009237), as part of the Moonshot Research and Development  
338 Program, “Technologies for Smart Bio-industry and Agriculture” run by the Ministry of  
339 Agriculture, Forestry and Fisheries. NAG was supported by JSPS Invitational Fellowships for  
340 Research in Japan (L19542).

341

### 342 **AUTHOR CONTRIBUTIONS**

343 NAG and TS conceived and planned the study. NAG performed experimental procedures and  
344 collected data. NAG and TS performed analysis and wrote the manuscript.

345

### 346 **CONFLICTS OF INTEREST**

347 The authors declare no conflicts of interest.

348 **REFERENCES**

- 349 Baum JA, Bogaert T, Clinton W, Heck GR, Feldmann P, Ilagan O, Johnson S, Plaetinck G,  
350 Munyikwa T, Pleau M, Vaughn T (2007) Control of coleopteran insect pests through RNA  
351 interference. *Nat Biotechnol* 25:1322–1326. <https://doi.org/10.1038/nbt1359>
- 352 Bensoussan N, Dixit S, Tabara M, Letwin D, Milojevic M, Antonacci M, Jin P, Arai Y, Bruinsma  
353 K, Suzuki T, Fukuhara T, Zhurov V, Geibel S, Nauen R, Grbic M, Grbic V (2020)  
354 Environmental RNA interference in two-spotted spider mite, *Tetranychus urticae*,  
355 reveals dsRNA processing requirements for efficient RNAi response. *Sci Rep* 10:19126.  
356 <https://doi.org/10.1038/s41598-020-75682-6>
- 357 Bohrmann J, Braun B (1999) Na, K-ATPase and V-ATPase in ovarian follicles of *Drosophila*  
358 *melanogaster*. *Biol Cell* 91:85–98. [https://doi.org/10.1016/S0248-4900\(99\)80033-1](https://doi.org/10.1016/S0248-4900(99)80033-1)
- 359 Bucher G, Scholten J, Klingler M (2002) Parental RNAi in *Tribolium* (Coleoptera). *Curr Biol*  
360 12(3):R85–R86. [https://doi.org/10.1016/S0960-9822\(02\)00666-8](https://doi.org/10.1016/S0960-9822(02)00666-8)
- 361 Camargo RA, Barbosa GO, Possignolo IP, Peres LE, Lam E, Lima JE, Figueira A, Marques-Souza  
362 H (2016) RNA interference as a gene silencing tool to control *Tuta absoluta* in tomato  
363 (*Solanum lycopersicum*). *PeerJ* 4:e2673. <https://doi.org/10.7717/peerj.2673>
- 364 Castagnoli M, Simoni S (2003) *Neoseiulus californicus* (McGregor) (Acari Phytoseiidae): survey  
365 of biological and behavioural traits of a versatile predator. *Redia* 86:153–164.
- 366 Cotter K, Stransky L, McGuire C, Forgac M (2015) Recent insights into the structure, regulation,  
367 and function of the V-ATPases. *Trends Biochem Sci* 40:611–622.  
368 <https://doi.org/10.1016/j.tibs.2015.08.005>
- 369 Fire A, Xu S, Montgomery MK, Kostas SA, Driver SE, Mello CC (1998) Potent and specific  
370 genetic interference by double-stranded RNA in *Caenorhabditis elegans*. *Nature*  
371 391:806. <https://doi.org/10.1038/35888>
- 372 Forgac M (2007) Vacuolar ATPases: rotary proton pumps in physiology and pathophysiology.  
373 *Nat Rev Mol Cell Biol* 8:917–929. <https://doi.org/10.1038/nrm2272>

- 374 Fu KY, Guo WC, Lü FG, Liu XP, Li GQ (2014) Response of the vacuolar ATPase subunit E to RNA  
375 interference and four chemical pesticides in *Leptinotarsa decemlineata* (Say). Pestic  
376 Biochem Physiol 114:16–23. <https://doi.org/10.1016/j.pestbp.2014.07.009>
- 377 Fu KY, Guo WC, Ahmat T, Li GQ (2015) Knockdown of a nutrient amino acid transporter gene  
378 LdNAT1 reduces free neutral amino acid contents and impairs *Leptinotarsa*  
379 *decemlineata* pupation. Sci Rep 5:18124. <https://doi.org/10.1038/srep18124>
- 380 Ghazy NA, Okamura M, Sai K, Yamakawa S, Hamdi FA, Grbic V, Suzuki T (2020) A leaf-  
381 mimicking method for oral delivery of bioactive substances into sucking arthropod  
382 herbivores. Front Plant Sci 11:1218. <https://doi.org/10.3389/fpls.2020.01218>
- 383 Ghazy NA, Suzuki T (2019) Oral delivery of water-soluble compounds to the phytoseiid mite  
384 *Neoseiulus californicus* (Acari: Phytoseiidae). PLoS ONE 14:e0223929.  
385 <https://doi.org/10.1371/journal.pone.0223929>
- 386 Gotoh T, Yamaguchi K, Mori K (2004) Effect of temperature on life history of the predatory  
387 mite *Amblyseius (Neoseiulus) californicus* (Acari: Phytoseiidae). Exp Appl Acarol 32:15–  
388 30. <https://doi.org/10.1023/B:APPA.0000018192.91930.49>
- 389 Hannon GJ (2002) RNA interference. Nature 418:244–251. <https://doi.org/10.1038/418244a>
- 390 Harvey WR (1992) Physiology of V-ATPases. J Exp Biol 172: 1–17.
- 391 Harvey WR, Maddrell SH, Telfer WH, Wieczorek H (1998) H<sup>+</sup> V-ATPases energize animal  
392 plasma membranes for secretion and absorption of ions and fluids. Am Zool 38:426–  
393 441. <https://doi.org/10.1093/icb/38.3.426>
- 394 Harvey WR, Boudko DY, Rheault MR, Okech BA (2009) NHEVNAT: an H<sup>+</sup> V-ATPase electrically  
395 coupled to a Na<sup>+</sup>: nutrient amino acid transporter (NAT) forms an Na<sup>+</sup>/H<sup>+</sup> exchanger  
396 (NHE). J Exp Biol 212:347–357. <https://doi.org/10.1242/jeb.026047>
- 397 Hoy MA, Waterhouse RM, Wu K, Estep AS, Ioannidis P, Palmer WJ, Pomerantz AF, Simao FA,  
398 Thomas J, Jiggins FM, Murphy TD (2016) Genome sequencing of the phytoseiid  
399 predatory mite *Metaseiulus occidentalis* reveals completely atomized Hox genes and  
400 superdynamic intron evolution. Genome Biol Evol 8(6):1762-1775.  
401 <https://doi.org/10.1093/gbe/evw048>

- 402 Huvenne H, Smagghe G (2010) Mechanisms of dsRNA uptake in insects and potential of RNAi  
403 for pest control: a review. *J Insect Physiol* 56:227–235.  
404 <https://doi.org/10.1016/j.jinsphys.2009.10.004>
- 405 Khila A, Grbić M (2007) Gene silencing in the spider mite *Tetranychus urticae*: dsRNA and  
406 siRNA parental silencing of the Distal-less gene. *Dev Genes Evol* 217:241–251.  
407 <https://doi.org/10.1007/s00427-007-0132-9>
- 408 Klein U (1992) The insect V-ATPase, a plasma membrane proton pump energizing secondary  
409 active transport: immunological evidence for the occurrence of a V-ATPase in insect ion-  
410 transporting epithelia. *J Exp Biol* 172:345–354.
- 411 Knight AJ, Behm CA (2012) Minireview: the role of the vacuolar ATPase in nematodes. *Exp*  
412 *Parasitol* 132:47–55. <https://doi.org/10.1016/j.exppara.2011.09.004>
- 413 Li C, Xia Y (2012) Vacuolar ATPase subunit H is essential for the survival and moulting of  
414 *Locusta migratoria manilensis*. *Insect Mol Biol* 21:405–413.  
415 <https://doi.org/10.1111/j.1365-2583.2012.01147.x>
- 416 Mao J, Zhang P, Liu C, Zeng F (2015) Co-silence of the coatomer  $\beta$  and v-ATPase A genes by  
417 siRNA feeding reduces larval survival rate and weight gain of cotton bollworm,  
418 *Helicoverpa armigera*. *Pestic Biochem Phys* 118:71–76.  
419 <https://doi.org/10.1016/j.pestbp.2014.11.013>
- 420 Maxson ME, Grinstein S (2014) The vacuolar-type H(+)-ATPase at a glance - more than a  
421 proton pump. *J Cell Sci* 127:4987–4993. <https://doi.org/10.1242/jcs.158550>
- 422 McMurtry JA, De Moraes GJ, Sourassou NF (2013) Revision of the lifestyles of phytoseiid mites  
423 (Acari: Phytoseiidae) and implications for biological control strategies. *Syst Appl Acarol*  
424 18:297–321. <https://doi.org/10.11158/saa.18.4.1>
- 425 Merzendorfer H, Reineke S, Zhao XF, Jacobmeier B, Harvey WR, Wieczorek H (2000) The  
426 multigene family of the tobacco hornworm V-ATPase: novel subunits a, C, D, H, and  
427 putative isoforms. *Biochim Biophys Acta* 25:369–379. [https://doi.org/10.1016/S0005-](https://doi.org/10.1016/S0005-2736(00)00233-9)  
428 [2736\(00\)00233-9](https://doi.org/10.1016/S0005-2736(00)00233-9)



- 429 Nishi T, Forgac M (2002) The vacuolar (H<sup>+</sup>)-ATPases—nature's most versatile proton  
430 pumps. *Nat Rev Mol Cell Biol* 3:94–103. <https://doi.org/10.1038/nrm729>
- 431 Ozawa R, Nishimura O, Yazawa S, Muroi A, Takabayashi J, Arimura GI (2012) Temperature-  
432 dependent, behavioural, and transcriptional variability of a tritrophic interaction  
433 consisting of bean, herbivorous mite, and predator. *Mol Ecol* 21:5624–5635.  
434 <https://doi.org/10.1111/mec.12052>
- 435 Petchampai N, Sunyakumthorn P, Guillotte ML, Thepparit C, Kearney MT, Mulenga A, Azad  
436 AF, Macaluso KR (2014) Molecular and functional characterization of vacuolar-ATPase  
437 from the American dog tick *Dermacentor variabilis*. *Insect Mol Biol* 23:42–51.  
438 <https://doi.org/10.1111/imb.12059>
- 439 Pomerantz AF, Hoy MA (2015) RNAi-mediated knockdown of transformer-2 in the predatory  
440 mite *Metaseiulus occidentalis* via oral delivery of double-stranded RNA. *Exp Appl*  
441 *Acarol* 65:17–27. <https://doi.org/10.1007/s10493-014-9852-5>
- 442 Pomerantz AF, Hoy MA, Kawahara AY (2015) Molecular characterization and evolutionary  
443 insights into potential sex-determination genes in the western orchard predatory mite  
444 *Metaseiulus occidentalis* (Chelicerata: Arachnida: Acari: Phytoseiidae). *J Biomol Struct*  
445 *Dyn* 33:1239–1253. <https://doi.org/10.1080/07391102.2014.941402>
- 446 Powell ME, Bradish HM, Gatehouse JA, Fitches EC (2017) Systemic RNAi in the small hive  
447 beetle *Aethina tumida* Murray (Coleoptera: Nitidulidae), a serious pest of the European  
448 honey bee *Apis mellifera*. *Pest Manag Sci* 73:53–63. <https://doi.org/10.1002/ps.4365>
- 449 R Core Team (2020). R: A language and environment for statistical computing. R Foundation  
450 for Statistical Computing, Vienna, Austria. URL <https://www.R-project.org/>
- 451 Rose TM, Schultz ER, Henikoff JG, Pietrokovski S, McCallum CM, Henikoff S (1998) Consensus-  
452 degenerate hybrid oligonucleotide primers for amplification of distantly related  
453 sequences. *Nucleic Acids Res* 26:1628–1635. <https://doi.org/10.1093/nar/26.7.1628>
- 454 Sato K, Miyata K, Ozawa S, Hasegawa K (2019) Systemic RNAi of V-ATPase subunit B causes  
455 molting defect and developmental abnormalities in *Periplaneta fuliginosa*. *Insect Sci*  
456 26:721–731. <https://doi.org/10.1111/1744-7917.12565>

- 457 Sijia B, Jiale L, Juan X, Dianyi S, Endong W, Guiting L, Xuenong X (2019) RNAi mediated  
458 knockdown of RpL11, RpS2, and tra-2 led to reduced reproduction of *Phytoseiulus*  
459 *persimilis*. Exp Appl Acarol 78(4):505–520. [https://doi.org/10.1007/s10493-019-00403-](https://doi.org/10.1007/s10493-019-00403-2)  
460 [2](https://doi.org/10.1007/s10493-019-00403-2)
- 461 Suzuki T, Nunes MA, España MU, Namin HH, Jin P, Bensoussan N, Zhurov V, Rahman T, De  
462 Clercq R, Hilson P, Grbic V (2017a) RNAi-based reverse genetics in the chelicerate model  
463 *Tetranychus urticae*: A comparative analysis of five methods for gene silencing. PLoS  
464 ONE 12:e0180654. <https://doi.org/10.1371/journal.pone.0180654>
- 465 Suzuki T, España MU, Nunes MA, Zhurov V, Dermauw W, Osakabe M, Van Leeuwen T, Grbic  
466 M, Grbic V (2017b) Protocols for the delivery of small molecules to the two-spotted  
467 spider mite, *Tetranychus urticae*. PLoS ONE 12:e0180658.  
468 <https://doi.org/10.1371/journal.pone.0180658>
- 469 Toei M, Saum R, Forgac M (2010) Regulation and isoform function of the V-  
470 ATPases. Biochemistry 49(23):4715–4723. <https://doi.org/10.1021/bi100397s>
- 471 Tokuoka A, Itoh TQ, Hori S, Uryu O, Danbara Y, Nose M, Bando T, Tanimura T, Tomioka K  
472 (2017) Cryptochrome genes form an oscillatory loop independent of the per/tim loop  
473 in the circadian clockwork of the cricket *Gryllus bimaculatus*. Zool Lett 3:1-14.  
474 <https://doi.org/10.1186/s40851-017-0066-7>
- 475 Wieczorek H, Grber G, Harvey WR, Huss M, Merzendorfer H, Zeiske W (2000) Structure and  
476 regulation of insect plasma membrane H (+) V-ATPase. J Exp Biol 203:127–135.  
477 <https://doi.org/10.1242/jeb.203.1.127>
- 478 Wieczorek H, Beyenbach KW, Huss M, Vitavska O (2009) Vacuolar-type proton pumps in insect  
479 epithelia. J Exp Biol 212:1611–1619. <https://doi.org/10.1242/jeb.030007>
- 480 Wu K, Hoy MA (2014) Oral delivery of double-stranded RNA induces prolonged and systemic  
481 gene knockdown in *Metaseiulus occidentalis* only after feeding on *Tetranychus urticae*.  
482 Exp Appl Acarol 63:171–187. <https://doi.org/10.1007/s10493-014-9772-4>
- 483 Wu K, Hoy MA (2016) The glutathione-S-transferase, cytochrome P450 and  
484 carboxyl/cholinesterase gene superfamilies in predatory mite *Metaseiulus occidentalis*.  
485 PLoS ONE 11:e0160009. <https://doi.org/10.1371/journal.pone.0160009>

486 Yao J, Rotenberg D, Afsharifar A, Barandoc-Alviar K, Whitfield AE (2013) Development of RNAi  
487 methods for *Peregrinus maidis*, the corn planthopper. PLoS ONE 8:e70243.  
488 <https://doi.org/10.1371/journal.pone.0070243>

## 489 FIGURE LEGENDS

490 **Fig. 1** Images of *N. californicus* adult mites (**a–d**) and early immature mites (**e–h**) that illustrate  
491 the droplet feeding method. (**a**) An adult female mite just after collection and (**b**) after being  
492 starved for 24 h. Water was then provided, and images taken 24 h later show mites that  
493 ingested (**c**) water or (**d**) water containing a blue tracer dye (Brilliant Blue FCF). (**e**) A newly  
494 hatched larva (~6 h old) that was confined for 24 h to ensure completion of the larval stage,  
495 and (**f**) a newly emerged protonymph, which will be able to ingest a test solution. (**g**) shows a  
496 protonymph that received water for 24 h from the larval stage and (**h**) one that received water  
497 containing a blue tracer dye. Scale bar: 100  $\mu\text{m}$ .

498 **Fig. 2** A phylogenetic tree of the *V-ATPase subunit A* gene. The tree was constructed by the  
499 neighbor-joining method with 500 bootstrap replicates generated from protein sequence  
500 alignments of *V-ATPase subunit A* in *N. californicus* with those in several mite, tick, and insect  
501 species. GenBank accession numbers for the species used in the analysis are listed in Table S1.  
502 The numbers on interior branches are bootstrap values.

503 **Fig. 3** The effect of  $1\text{-}\mu\text{g } \mu\text{L}^{-1}$  dsRNA-*NcVATPase* or dsRNA-*DsRed2* (negative control) delivered  
504 by the droplet feeding method on the endogenous *NcVATPase* gene expression levels,  
505 survivorship, fecundity, and food consumption in adult *N. californicus* females at 25 °C. (**a**)  
506 *NcVATPase* gene expression in adult females relative to the expression of the actin reference  
507 gene at 4 days after treatment with dsRNA-*NcVATPase* and dsRNA-*DsRed2*. Data are  
508 represented as the mean  $\pm$  SE and compared using the *t*-test. (**b**) Survivorship of adult females  
509 for 10 days after treatment with dsRNA-*NcVATPase* and dsRNA-*DsRed2*. Survival curves were  
510 plotted by the Kaplan–Meier method and compared using the log-rank test. (**c**) Fecundity of  
511 adult females for 10 days after treatment with dsRNA-*NcVATPase* and dsRNA-*DsRed2*. (**d**) The  
512 average number of prey eggs (*T. urticae*) consumed per female *N. californicus* in three  
513 successive days. (**e**) Images show the body phenotype associated with each dsRNA treatment.  
514 Scale bar: 100  $\mu\text{m}$ . Smaller bodies were observed in 100% of females given dsRNA-*NcVATPase*  
515 treatment. (**a, b, c, d**) Data are from at least three independent experimental runs. (**c, d**) Data  
516 are represented by bee-swarm and box-and-whisker plots and compared using a *t*-test. The  
517 central line (second quartile, Q2) indicates the median, the distance between the bottom (first  
518 quartile, Q1) and top (third quartile, Q3) of the box indicates the interquartile range (IQR),  
519 and the bottom whisker and top whisker indicates the minimum and maximum value,

520 respectively. Outliers that are outside the range between the lower [Q1 – 1.5 × IQR] and upper  
521 limits [Q3 + 1.5 × IQR] are plotted outside of the IQR.

522 **Fig. 4** The effect of 1 µg µL<sup>-1</sup> dsRNA-*NcVATPase* or dsRNA-*DsRed2* (negative control) delivered  
523 to *N. californicus* larvae by the droplet feeding method on the development, survival, and  
524 fecundity in adult females at 25 °C. (a) Time taken from larval stage to adulthood after  
525 treatment with dsRNA-*NcVATPase* and dsRNA-*DsRed2*. (b) Survival at 10 days after treatment  
526 of females that emerged from treated larvae. (c) Fecundity of adult females that developed  
527 from larvae treated with dsRNA-*NcVATPase* and dsRNA-*DsRed2*, measured during the first 5  
528 days of oviposition. Data are represented by bee-swarm and box-and-whisker plots and  
529 compared using a *t*-test. (d) Hatchability of eggs produced by adult females of *N. californicus*  
530 that had been exposed when larvae to dsRNA-*NcVATPase* and dsRNA-*DsRed2*. (a, b, d) Data  
531 are represented as percentage ± SE and compared using the chi-square test. Numerical values  
532 in parentheses indicate the total number of mites tested. (e) Images show the deformed  
533 shape and soft shell of the egg phenotype associated with dsRNA-*NcVATPase* treatment. Scale  
534 bar: 100 µm. (a, b, c, d) Data are from at least three independent experimental runs.

535 **Table S1** Species list and GenBank accession numbers of species used in the  
536 evolutionary analysis of *N. californicus* V-ATPase.

Figure 1

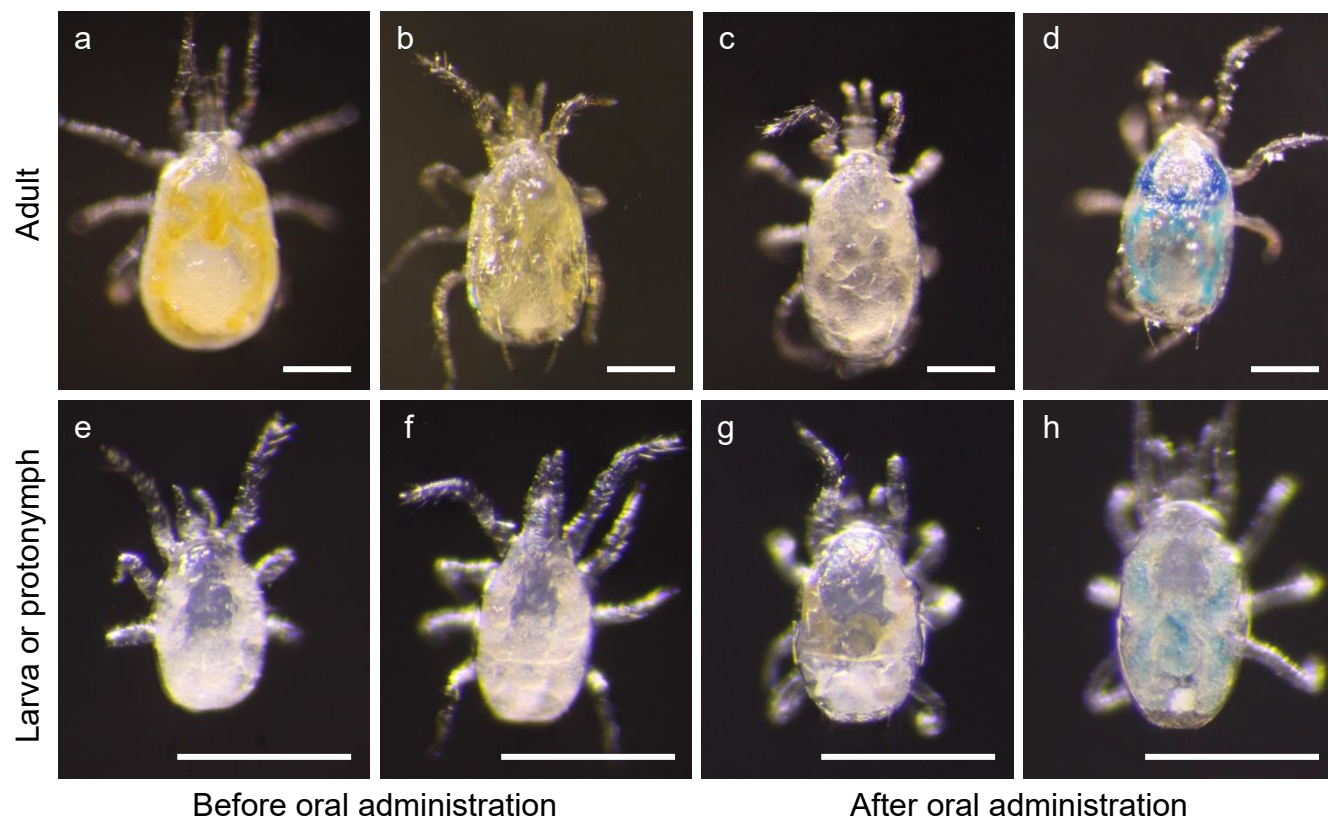

Figure 2

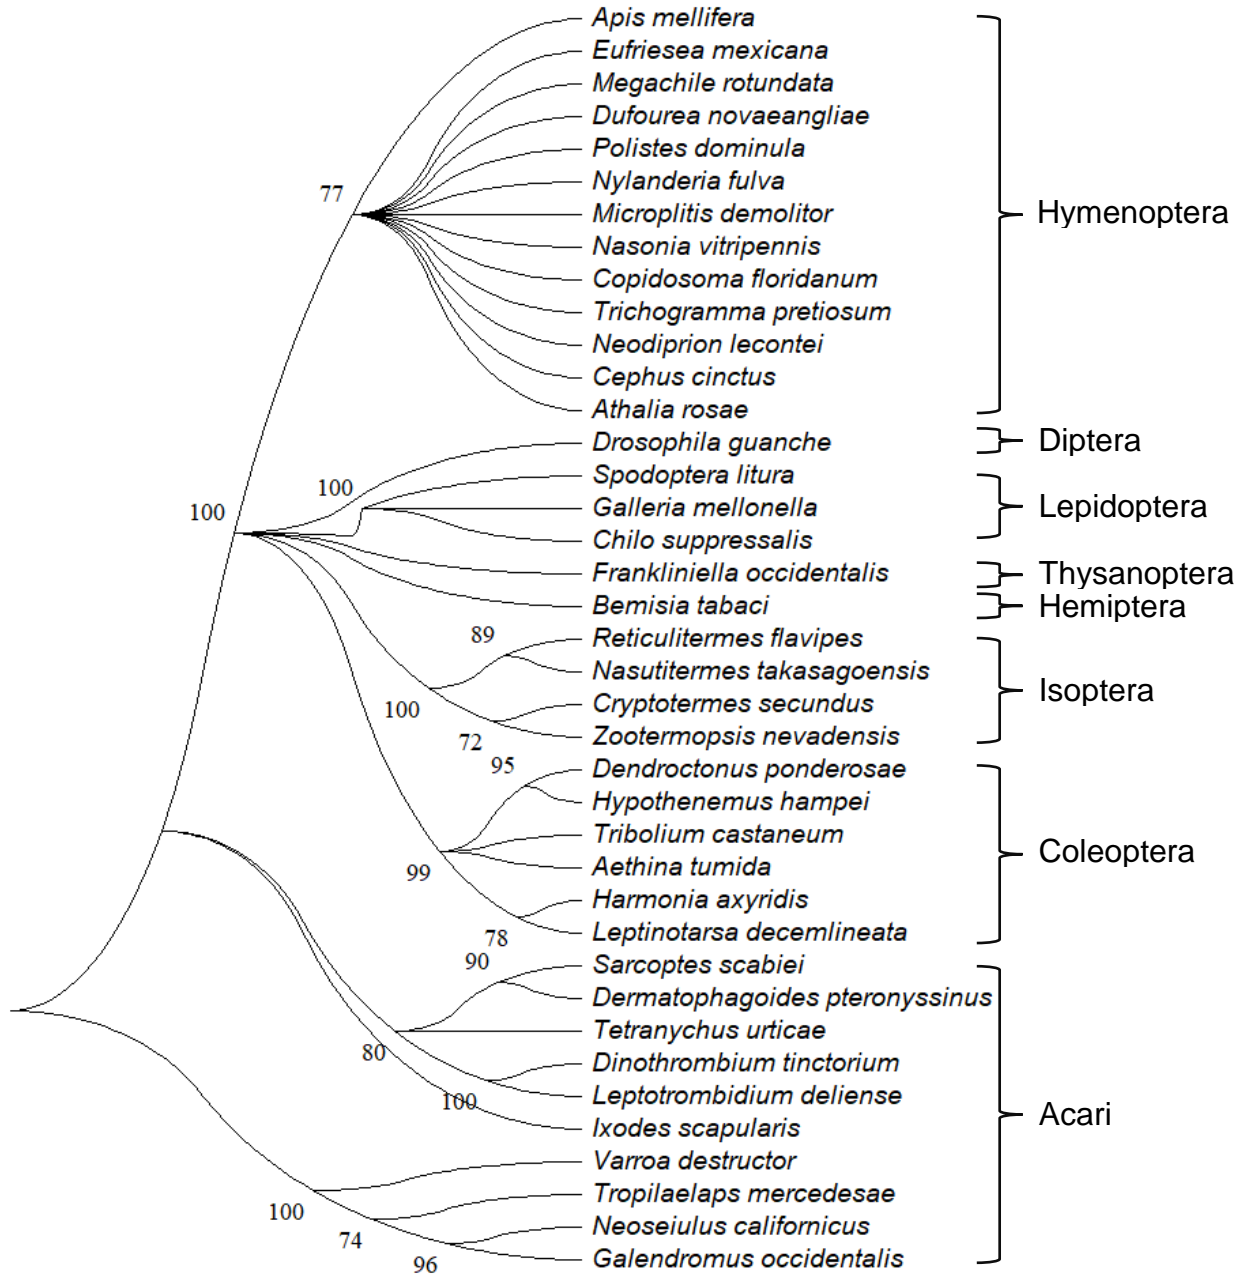

Figure 3

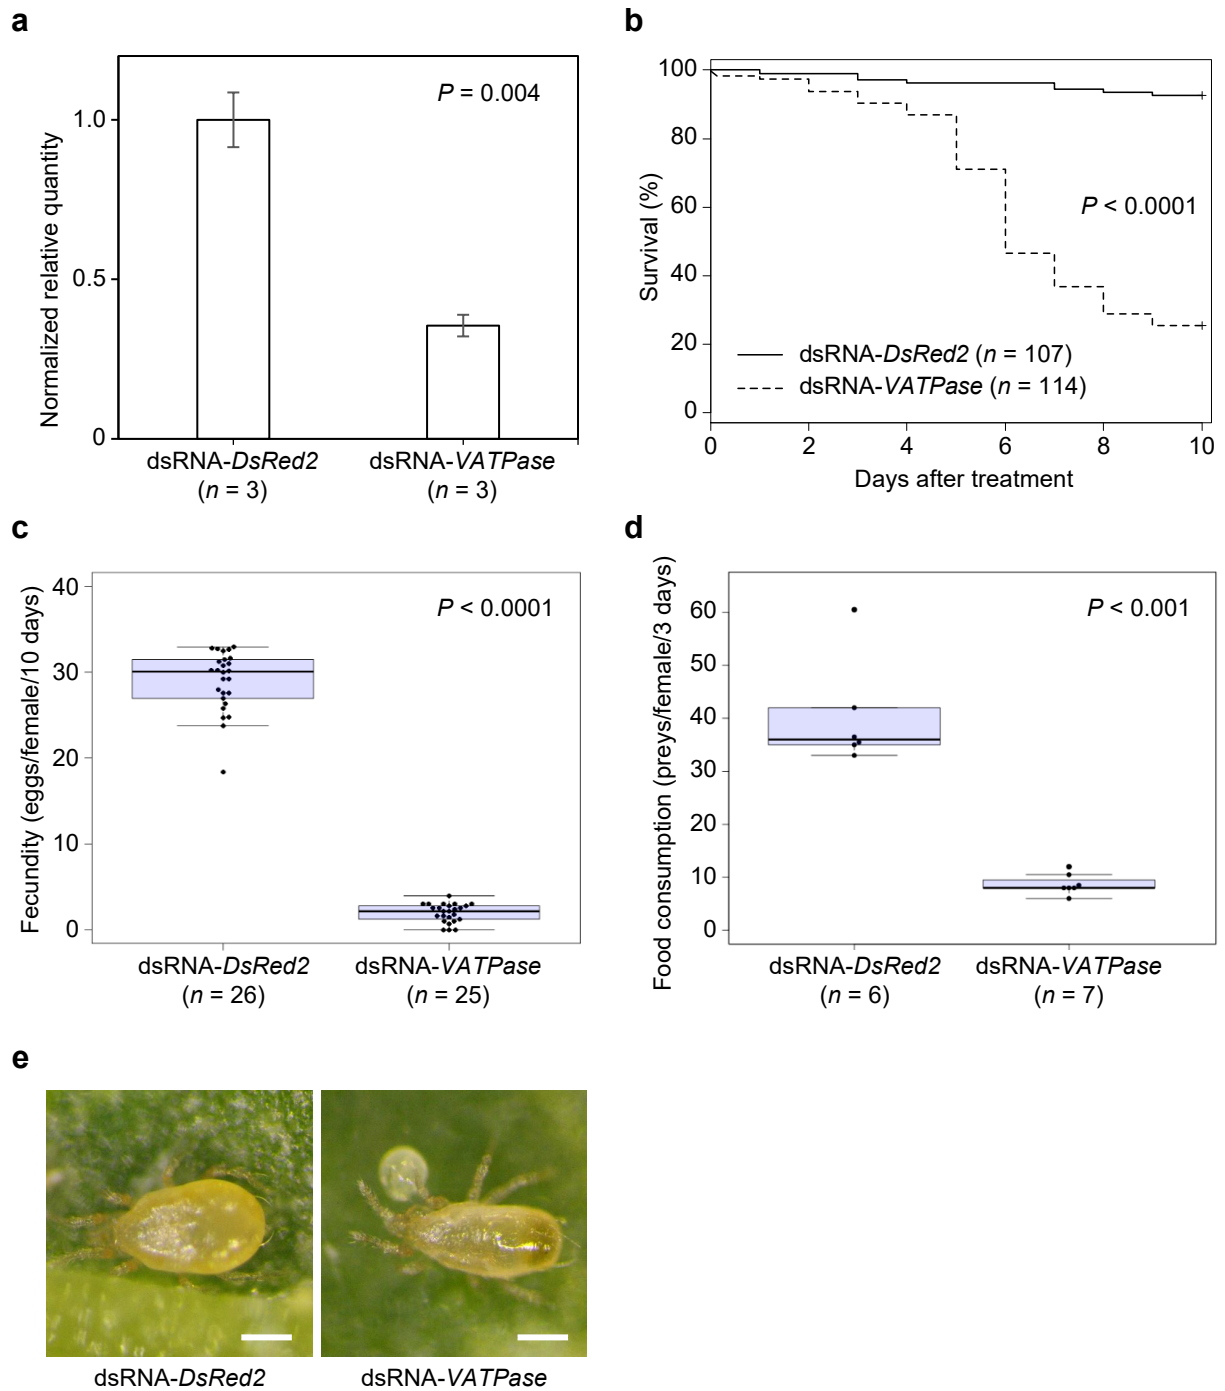



Figure 4

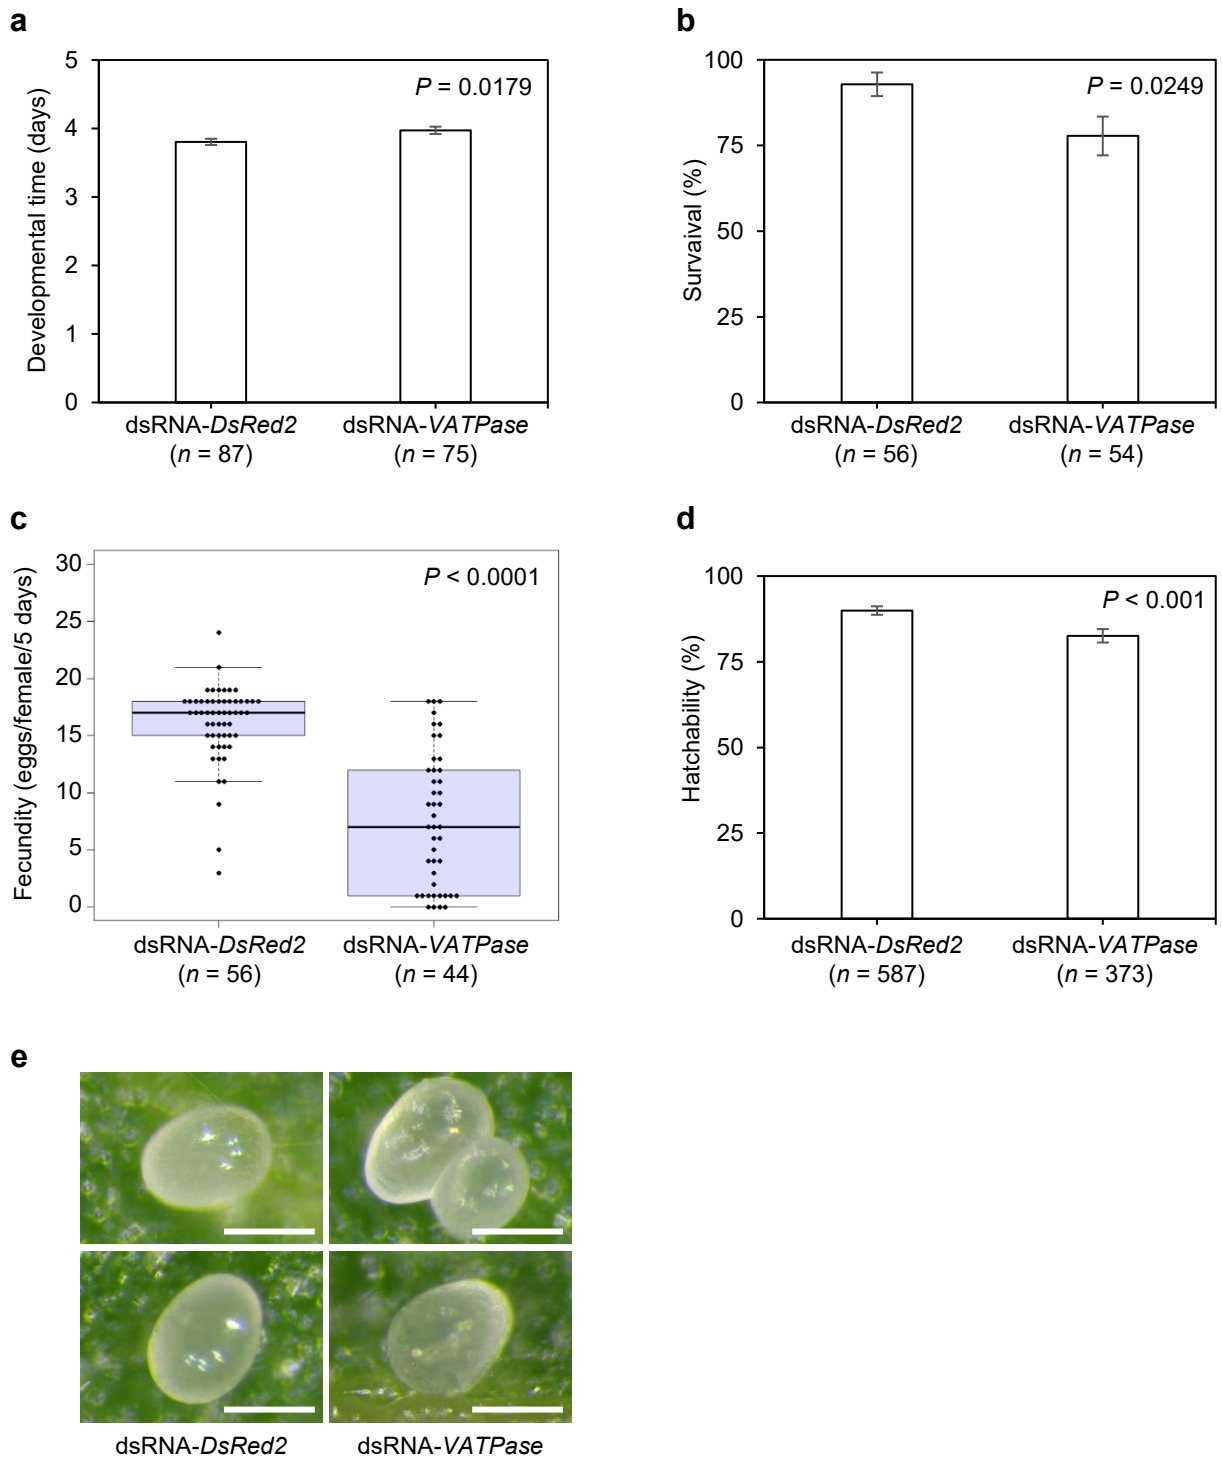

Source: https://www.biorxiv.org/content/10.1101/2021.06.25.450003v1.full.pdf
